# Supplementary material
Source: publisher site journal article supplement (https://www.dovepress.com/article/596863)
Supplement: Supplementary file 1 [file 596863%20Appendix_1.docx]

# Appendix

**sTable 1.** ICD-8 and ICD-10 diagnosis codes used for the Charlson Comorbidity Index disease groups.

| Disease | ICD-8 codes | ICD-10 codes |
| --- | --- | --- |
| Myocardial infarction | 410 | I21, I22, I23 |
| Congestive heart failure | 42709, 42710, 42711, 42719, 42899, 78249 | I50, I110, I130, I132 |
| Peripheral vascular disease | 440, 441, 442, 443, 444, 445 | I70, I71, I72, I73, I74, I77 |
| Cerebrovascular disease | 430, 431, 432, 433, 434, 435, 436, 437, 438 | I6, G45, G46 |
| Dementia | 29009, 2901, 29309 | F00, F01, F02, F03, F051, G30 |
| Chronic pulmonary disease | 490, 491, 492, 493, 515, 516, 517, 518 | J40, J41, J42, J43, J44, J45, J46, J47, J60, J61, J62, J63, J64, J65, J66, J67, J684, J701, J703, J841, J920, J961, J982, J983 |
| Connective tissue disease | 712, 716, 734, 446, 13599 | M05, M06, M08, M09, M30, M31, M32, M33, M34, M35, M36, D86 |
| Ulcer disease | 53091, 53098, 531, 532, 533, 534 | K221, K25, K26, K27, K28 |
| Mild liver disease | 571, 57301, 57304 | B18, K700, K701, K702, K703, K709, K71, K73, K74, K760 |
| Diabetes without end-organ damage | 24900, 24906, 24907, 24909, 25000, 25006, 25007, 25009 | E100, E101, E109, E110, E111, E119 |
| Hemiplegia | 344 | G81, G82 |
| Moderate to severe renal disease | 403, 404, 580, 581, 582, 583, 584, 59009, 59319, 7531, 792 | I12, I13, N00, N01, N02, N03, N04, N05, N07, N11, N14, N17, N18, N19, Q61 |
| Diabetes with end-organ damage | 24901, 24902, 24903, 24904, 24905, 24908, 25001, 25002, 25003, 25004, 25005, 25008 | E102, E103, E104, E105, E106, E107, E108, E112, E113, E114, E115, E116, E117, E118 |
| Non-metastatic solid tumor * | 14, 15, 16, 17, 18, 190, 191, 192, 193, 194 | C0, C1, C2, C3, C4, C5, C6, C70, C71, C72, C73, C74, C75 |
| Leukaemia * | 204, 205, 206, 207 | C91, C92, C93, C94, C95 |
| Lymphoma * | 200, 201, 202, 203, 27559 | C81, C82, C83, C84, C85, C88, C90, C96 |
| Moderate to severe liver disease | 07000, 07002, 07004, 07006, 07008, 57300, 4560 | B150, B160, B162, B190, K704, K72, K766, I85 |
| Metastatic solid tumor * | 195, 196, 197, 198, 199 | C76, C77, C78, C79, C80 |
| AIDS | 07983 | B21, B22, B23, B24 |

** Excluded from the modified CCI calculation.*

**Note:** Codes are prefix-based; e.g., I6 includes all codes beginning with I6 (I60, I61, ..., I69). If a patient had both mild and moderate-to-severe liver disease, only the latter was included. The same logic applied to diabetes with/without end-organ damage.

**sTable 2.** Comorbidities at cancer diagnosis among members of the CDC Cohort.

| **Comorbidity** | **N (%)** |
| --- | --- |
| **Myocardial infarction** | 3 597 (5.3%) |
| **Congestive heart failure** | 2 680 (3.9%) |
| **Peripheral vascular disease** | 2 837 (4.2%) |
| **Cerebrovascular disease** | 6 706 (9.9%) |
| **Dementia** | 533 (0.8%) |
| **Chronic pulmonary disease** | 6 741 (9.9%) |
| **Connective tissue disease** | 2 814 (4.1%) |
| **Ulcer disease** | 2 659 (3.9%) |
| **Mild liver disease** | 1 162 (1.7%) |
| **Diabetes without end-organ damage** | 4 040 (5.9%) |
| **Hemiplegia** | 195 (0.3%) |
| **Moderate to severe renal disease** | 2 161 (3.2%) |
| **Diabetes with end-organ damage** | 1 982 (2.9%) |
| **Moderate to severe liver disease** | 345 (0.5%) |
| **AIDS** | 49 (0.1%) |
| **Venous thromboembolism** | 2 560 (3.8%) |
| **Mood, stress-related, or anxiety disorders** | 4 213 (6.2%) |
| **Alcohol or substance abuse disorders** | 2 659 (3.9%) |
| **Bipolar affective disorders** | 425 (0.6%) |
| **Schizophrenia** | 349 (0.5%) |

**sTable 3.** Frequency of uncategorized cancers diagnosed in members of the CDC Cohort.

| Cancer type | N |
| --- | --- |
| Uncategorized C81-C96 (lymphoid, haematopoietic and related tissue) | 1 700 |
| Uncategorized C00-C01 (lip, oral cavity and pharynx) | 1 664 |
| Uncategorized C76-C80 (ill-defined, secondary and unspecified sites) | 1 360 |
| Uncategorized C73-C75 (thyroid and other endocrine glands) | 1 077 |
| Uncategorized C45-C49 (mesothelial and soft tissue) | 828 |
| Uncategorized D37-D48 (neoplasms of uncertain or unknown behaviour) | 746 |
| Uncategorized D00-D09 (in situ neoplasms) | 718 |
| Uncategorized C30-C39 (respiratory and intrathoracic organs) | 609 |
| Uncategorized C15-C26 (digestive organs) | 586 |
| Uncategorized D10-D36 (benign neoplasms) | 281 |
| Uncategorized C64-C68 (urinary tract) | 252 |
| Uncategorized C51-C58 (female genital organs) | 250 |
| Uncategorized C40-C41 (bone and articular cartilage) | 179 |
| Uncategorized C69-C72 (brain and CNS) | 156 |
| Uncategorized C60-C63 (male genital organs) | 138 |

**sTable 4.** Cancer stage, sex, and age distribution of members of the CDC Cohort, by cancer site.

| **Cancer type** | **All**  **N= 68028** | **Stage** | | | | | | **Women**  **N (%)** | **Age Median (IQR)** |
| --- | --- | --- | --- | --- | --- | --- | --- | --- | --- |
| **Missing** | **I** | **II** | **II-III** | **III** | **IV** |
| **Esophageal** | 851 (1.3%) | 224 (26.3%) | 12 (1.4%) | 97 (11.4%) | 0 (0.0%) | 159 (18.7%) | 359 (42.2%) | 232 (27.3%) | 69 (62 – 76) |
| **Stomach** | 1 214 (1.8%) | 335 (27.6%) | 127 (10.5%) | 111 (9.1%) | 0 (0.0%) | 229 (18.9%) | 412 (33.9%) | 393 (32.4%) | 70 (62 – 77) |
| **Colon** | 6 112 (9.0%) | 1 188 (19.4%) | 911 (14.9%) | 1 503 (24.6%) | 33 (0.5%) | 1 146 (18.7%) | 1 331 (21.8%) | 2 945 (48.2%) | 71 (64 – 79) |
| **Rectal** | 2 965 (4.4%) | 798 (26.9%) | 495 (16.7%) | 436 (14.7%) | 89 (3.0%) | 640 (21.6%) | 507 (17.1%) | 1 077 (36.3%) | 69 (61 – 77) |
| **Liver** | 754 (1.1%) | 221 (29.3%) | 98 (13.0%) | 99 (13.1%) | 0 (0.0%) | 135 (17.9%) | 201 (26.7%) | 221 (29.3%) | 69 (62 – 76) |
| **Biliary** | 380 (0.6%) | 171 (45.0%) | 8 (2.1%) | 75 (19.7%) | 0 (0.0%) | 14 (3.7%) | 112 (29.5%) | 218 (57.4%) | 71 (64 – 79) |
| **Pancreatic** | 1 671 (2.5%) | 637 (38.1%) | 88 (5.3%) | 128 (7.7%) | 0 (0.0%) | 15 (0.9%) | 803 (48.1%) | 783 (46.9%) | 71 (63 – 77) |
| **Non small cell lung carcinoma** | 7 264 (10.7%) | 367 (5.1%) | 1 619 (22.3%) | 547 (7.5%) | 0 (0.0%) | 1 310 (18.0%) | 3 421 (47.1%) | 3 581 (49.3%) | 71 (64 – 77) |
| **Small cell lung carcinoma** | 995 (1.5%) | 50 (5.0%) | 34 (3.4%) | 31 (3.1%) | 0 (0.0%) | 217 (21.8%) | 663 (66.6%) | 494 (49.6%) | 69 (62 – 75) |
| **Melanoma** | 4 299 (6.3%) | 1 179 (27.4%) | 2 408 (56.0%) ᵃ | 271 (6.3%) | 34 (0.8%) | 251 (5.8%) | 156 (3.6%) | 2 293 (53.3%) | 61 (48 – 72) |
| **Breast** | 9 100 (13.4%) | 1 360 (14.9%) | 3 717 (40.8%) | 2 818 (31.0%) | 82 (0.9%) | 840 (9.2%) | 283 (3.1%) | 9 039 (99.3%) | 64 (52 – 73) |
| **Cervical** | 621 (0.9%) | 159 (25.6%) | 244 (39.3%) | 136 (21.9%) | 0 (0.0%) | 31 (5.0%) | 51 (8.2%) | 621 (100.0%) | 49 (38 – 65) |
| **Uterine** | 1 445 (2.1%) | 351 (24.3%) | 823 (57.0%) | 57 (3.9%) | 7 (0.5%) | 98 (6.8%) | 109 (7.5%) | 1 445 (100.0%) | 68 (60 – 75) |
| **Ovarian** | 968 (1.4%) | 195 (20.1%) | 137 (14.2%) | 52 (5.4%) | 0 (0.0%) | 262 (27.1%) | 322 (33.3%) | 968 (100.0%) | 68 (58 – 75) |
| **Prostate** | 10 024 (14.7%) | 1 368 (13.6%) | 6 217 (62.0%) | 0 (0.0%) | 767 (7.7%) | 0 (0.0%) | 1 672 (16.7%) | 0 (0.0%) | 70 (65 – 76) |
| **Testicular** | 699 (1.0%) | 251 (35.9%) | 366 (52.4%) | 40 (5.7%) | 0 (0.0%) | 42 (6.0%) | 0 (0.0%) | 0 (0.0%) | 37 (29 – 46) |
| **Kidney** | 1 922 (2.8%) | 200 (10.4%) | 985 (51.2%) | 110 (5.7%) | 6 (0.3%) | 300 (15.6%) | 321 (16.7%) | 637 (33.1%) | 66 (57 – 73) |
| **Bladder** | 1 663 (2.4%) | 481 (28.9%) | 372 (22.4%) | 370 (22.2%) | 92 (5.5%) | 164 (9.9%) | 184 (11.1%) | 447 (26.9%) | 73 (66 – 80) |
| **Brain** | 984 (1.4%) | 0 (0.0%) | 984 (100.0%) | 0 (0.0%) | 0 (0.0%) | 0 (0.0%) | 0 (0.0%) | 412 (41.9%) | 62 (48 – 71) |
| **Hodgkin lymphoma** b | 302 (0.4%) | 302 (100.0%) | 0 (0.0%) | 0 (0.0%) | 0 (0.0%) | 0 (0.0%) | 0 (0.0%) | 129 (42.7%) | 37 (24 – 60) |
| **Non-Hodgkin lymphoma** b | 2 398 (3.5%) | 2 398 (100.0%) | 0 (0.0%) | 0 (0.0%) | 0 (0.0%) | 0 (0.0%) | 0 (0.0%) | 1 005 (41.9%) | 69 (59 – 77) |
| **Multiple myeloma** | 853 (1.3%) | 853 (100.0%) | 0 (0.0%) | 0 (0.0%) | 0 (0.0%) | 0 (0.0%) | 0 (0.0%) | 331 (38.8%) | 71 (63 – 77) |
| **Other** | 10 544 (15.5%) | 10 544 (100.0%) | 0 (0.0%) | 0 (0.0%) | 0 (0.0%) | 0 (0.0%) | 0 (0.0%) | 4 805 (45.6%) | 67 (56 – 75) |

a Stage I and I-II.

b Ann Arbor values are not available after 2019.

Abbreviations: IQR: inter-quartile range, N: number of people.

**sTable 5.** Most frequently dispensed medications among cancer patients in the CDC Cohort in the 3 months before or after cancer diagnosis.

| **Medication (ATC code)a** | **Calendar period** | | | |
| --- | --- | --- | --- | --- |
| **Total CDC Cohort**  **2012-2021**  (N = 68 028) | **2012-2015**  (N=26 675) | **2016-2018**  (N = 20 685) | **2019-2021**  (N= 20 6689) |
| **N (%)** | **N (%)** | **N (%)** | **N (%)** |
| **Paracetamol (N02BE01)** | 33 367 (49.0%) | 10 783 (40.4%) | 11 148 (53.9%) | 11 436 (55.3%) |
| **Pantoprazole (A02BC02)** | 16 503 (24.3%) | 6 002 (22.5%) | 5 188 (25.1%) | 5 313 (25.7%) |
| **Morphine (N02AA01)** | 13 728 (20.2%) | 4 884 (18.3%) | 4 157 (20.1%) | 4 687 (22.7%) |
| **Acetylsalicylic acid (B01AC06)** | 11 776 (17.3%) | 5 345 (20.0%) | 3 444 (16.6%) | 2 987 (14.5%) |
| **Simvastatin (C10AA01)** | 10 744 (15.8%) | 5 503 (20.6%) | 3 113 (15.0%) | 2 128 (10.3%) |
| **Ibuprofen (M01AE01)** | 10 628 (15.6%) | 4 094 (15.3%) | 3 431 (16.6%) | 3 103 (15.0%) |
| **Metoprolol (C07AB02)** | 10 099 (14.8%) | 3 933 (14.7%) | 3 087 (14.9%) | 3 079 (14.9%) |
| **Amlodipine (C08CA01)** | 9 992 (14.7%) | 3 851 (14.4%) | 2 957 (14.3%) | 3 184 (15.4%) |
| **Pivmecillinam (J01CA08)** | 8 803 (12.9%) | 3 395 (12.7%) | 2 746 (13.3%) | 2 662 (12.9%) |
| **Tramadol (N02AX02)** | 8 718 (12.8%) | 4 590 (17.2%) | 2 695 (13.0%) | 1 433 (6.9%) |
| **Prednisolone (H02AB06)** | 8 237 (12.1%) | 3 316 (12.4%) | 2 543 (12.3%) | 2 378 (11.5%) |
| **Furosemide (C03CA01)** | 8 044 (11.8%) | 3 216 (12.1%) | 2 402 (11.6%) | 2 426 (11.7%) |
| **Atorvastatin (C10AA05)** | 7 828 (11.5%) | 1 652 (6.2%) | 2 487 (12.0%) | 3 689 (17.8%) |
| **Losartan (C09CA01)** | 7 494 (11.0%) | 2 230 (8.4%) | 2 070 (10.0%) | 3 194 (15.5%) |
| **Phenoxymethylpenicillin (J01CE02)** | 7 257 (10.7%) | 3 089 (11.6%) | 2 240 (10.8%) | 1 928 (9.3%) |
| **Zopiclone (N05CF01)** | 6 995 (10.3%) | 3 110 (11.7%) | 2 131 (10.3%) | 1 754 (8.5%) |
| **Retigabine (A06AD65)** | 6 811 (10.0%) | 2 431 (9.1%) | 2 174 (10.5%) | 2 206 (10.7%) |
| **Metoclopramide (A03FA01)** | 6 726 (9.9%) | 2 733 (10.2%) | 2 004 (9.7%) | 1 989 (9.6%) |
| **Bendroflumethiazide and potassium (C03AB01)** | 6 673 (9.8%) | 2 978 (11.2%) | 1 861 (9.0%) | 1 834 (8.9%) |
| **Amoxicillin and beta-lactamase inhibitor (J01CR02)** | 6 100 (9.0%) | 2 095 (7.9%) | 2 086 (10.1%) | 1 919 (9.3%) |

a Based on data in the National Prescription Registry.

Abbreviation: ATC: Anatomical Therapeutic Chemical
